# Supplementary material
Source: PubMed Central journal article supplement (PMC7232664)
Supplement: Supp_FigS1.pdf [file Supp_FigS1.pdf]

# Supplementary Data

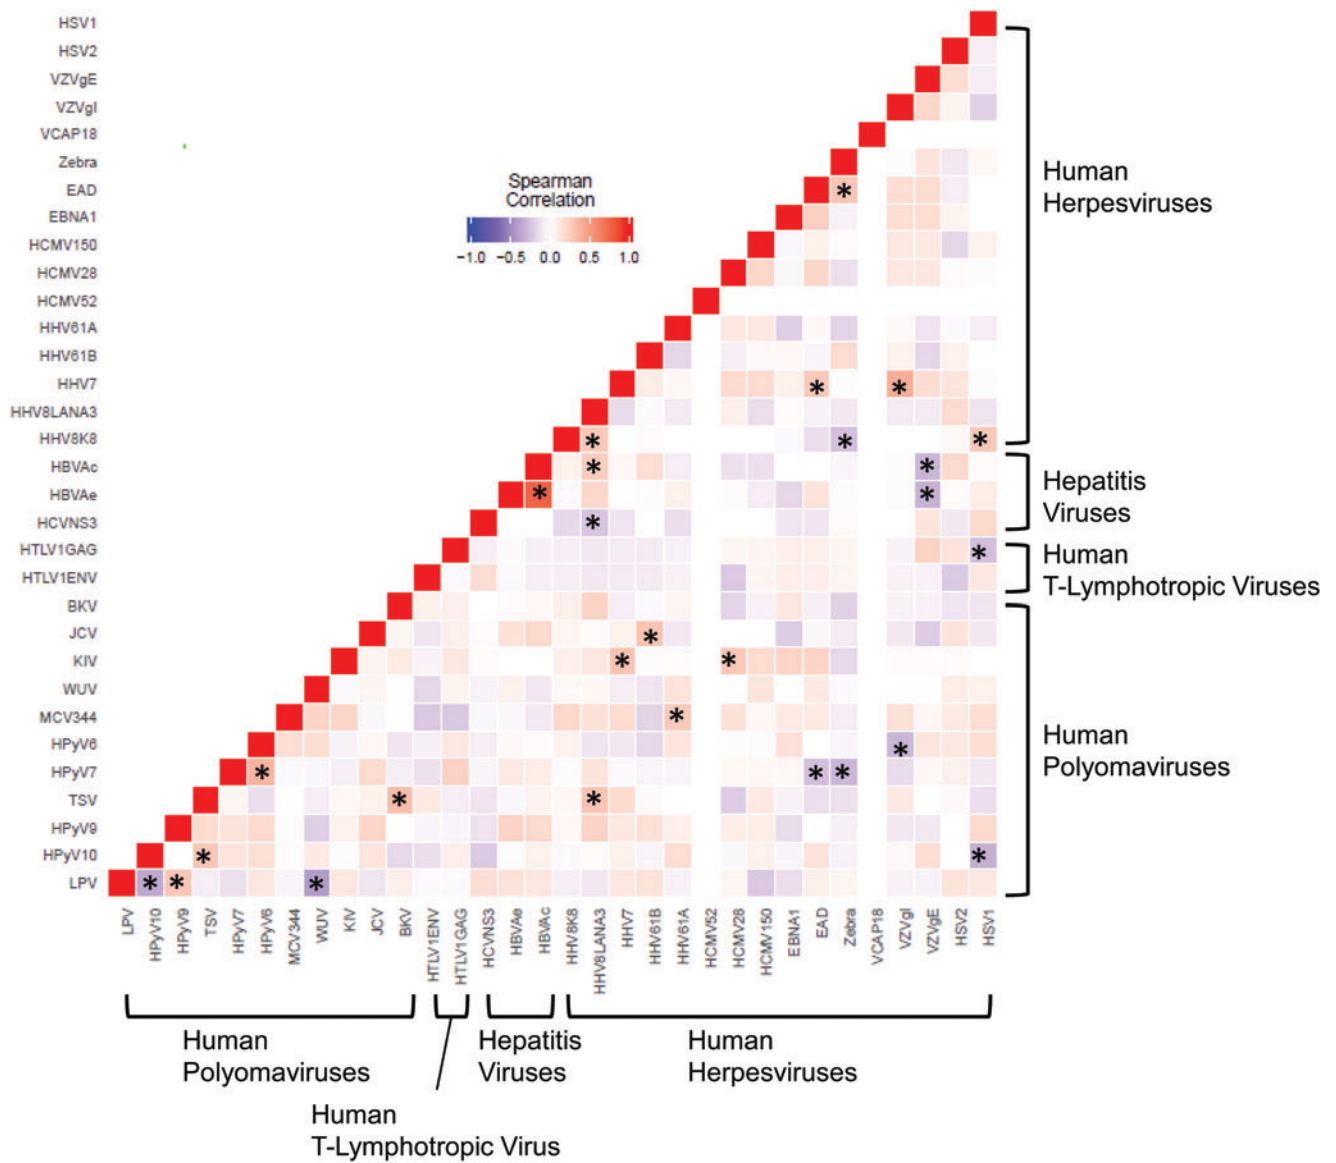

**SUPPLEMENTARY FIGURE S1.** Correlation matrix of viral seroreactivity in controls. \**p*-Value <.05.
