# Supplementary material
Source: PubMed Central journal article supplement (PMC7232664)
Supplement: Supp_TableS1.pdf [file Supp_TableS1.pdf]

SUPPLEMENTARY TABLE S1. CRITERIA FOR ANTIBODY SEROREACTIVITY AND VIRAL SEROPOSITIVITY

| <i>Viruses</i>                    | <i>Antigens</i>                                          | <i>MFI seroreactivity cutpoint</i> | <i>Definition of viral seropositivity</i> |
|-----------------------------------|----------------------------------------------------------|------------------------------------|-------------------------------------------|
| <b>Human herpesviruses</b>        |                                                          |                                    |                                           |
| HSV1/HHV1                         | HSV glycoprotein G (gG)                                  | >200                               | 1                                         |
| HSV2/HHV2                         | Membrane glycoprotein G (mgG unique)                     | >50                                | 1                                         |
| VZV/HHV3                          | gE (ORF68)                                               | >200                               | ≥1                                        |
|                                   | gI (ORF67)                                               | >200                               |                                           |
| EBV/HHV4                          | BamHI Z Epstein-Barr virus replication activator (ZEBRA) | >200                               | ≥2                                        |
|                                   | EBV early D antigen (EAD)                                | >200                               |                                           |
|                                   | EBV nuclear antigen (EBNA1)                              | >200                               |                                           |
|                                   | Viral capsid antigen p18 (VCA p18)                       | >200                               |                                           |
| CMV/HHV5                          | Phosphoprotein 150 (pp150)                               | >500                               | ≥2                                        |
|                                   | Phosphoprotein 52 (pp52)                                 | >500                               |                                           |
|                                   | Phosphoprotein 28 (pp28)                                 | >500                               |                                           |
| HHV6 <sup>a</sup>                 | Immediate-early 1A protein (IE1A)                        | >200                               | ≥1                                        |
|                                   | Immediate-early 1B protein (IE1B)                        | >200                               |                                           |
| HHV7                              | U14 protein, component of HHV7 tegument (U14)            | >200                               | 1                                         |
| KSHV/HHV8                         | Latency-associated nuclear antigen (LANA)                | >100                               | ≥1                                        |
|                                   | Lytic cycle protein K8.1 (K8.1)                          | >100                               |                                           |
| <b>Hepatitis virus</b>            |                                                          |                                    |                                           |
| HBV                               | Hepatitis B core antigen (HBc)                           | >100                               | 2                                         |
|                                   | Hepatitis B viral protein (HBv)                          | >100                               |                                           |
| HCV                               | Nonstructural protein 3 (NS3)                            | >80                                | 1                                         |
| <b>Human T lymphotropic virus</b> |                                                          |                                    |                                           |
| HTLV1                             | gag Protein                                              | >50                                | 2                                         |
|                                   | env Protein                                              | >50                                |                                           |
| <b>Human polyomaviruses</b>       |                                                          |                                    |                                           |
| BKV/HPyV1                         | Viral protein (VP1)                                      | >250                               | 1                                         |
| JCV/HPyV2                         | Viral protein (VP1)                                      | >250                               | 1                                         |
| KIV/HPyV3                         | Viral protein (VP1)                                      | >250                               | 1                                         |
| WUV/HPyV4                         | Viral protein (VP1)                                      | >250                               | 1                                         |
| MCV/HPyV5                         | Viral protein (VP1)                                      | >250                               | 1                                         |
| HPyV6                             | Viral protein (VP1)                                      | >250                               | 1                                         |
| HPyV7                             | Viral protein (VP1)                                      | >250                               | 1                                         |
| TSV/HPyV8                         | Viral protein (VP1)                                      | >250                               | 1                                         |
| HPyV9                             | Viral protein (VP1)                                      | >250                               | 1                                         |
| HPyV10                            | Viral protein (VP1)                                      | >250                               | 1                                         |
| LPV/HPyV14                        | Viral protein (VP1)                                      | >250                               | 1                                         |

<sup>a</sup>Seropositivity for HHV6A, HHV6B, or both.

CMV, (human) cytomegalovirus; EBV, Epstein-Barr virus; HHV, human herpesvirus; HPyV, human polyomavirus; HSV, human simplex virus; HTLV, human T lymphotropic virus; KSHV, Kaposi's sarcoma-associated herpesvirus; MCV- Merkel cell polyomavirus; MFI, median R-phycoerythrin fluorescence intensity; TSV, Trichodysplasia spinulosa-associated polyomavirus; VZV, varicella-zoster virus.
