# Supplementary material
Source: PubMed Central journal article supplement (PMC7232664)
Supplement: Supp_TableS2.pdf [file Supp_TableS2.pdf]

SUPPLEMENTARY TABLE S2. COEFFICIENT  
OF VARIATION AND INTRACLASS CORRELATION  
COEFFICIENT FOR LOG-TRANSFORMED  
ANTIBODY MEASUREMENTS

| <i>Antigen</i>             | <i>CV (%)</i> | <i>ICC (%)</i> |
|----------------------------|---------------|----------------|
| Human herpesvirus          |               |                |
| HSV1 IgG                   | 12            | 96             |
| HSV2 2mgG unique           | 37            | 92             |
| VZV gE                     | 10            | 99             |
| VZV gI                     | 16            | 97             |
| EBV VCA p18                | 9             | 87             |
| EBV Zebra                  | 14            | 97             |
| EBV EA-D                   | 11            | 97             |
| EBV EBNA1                  | 6             | 99             |
| CMV pp150                  | 10            | 97             |
| CMV pp28                   | 14            | 94             |
| CMV pp52                   | 11            | 92             |
| HHV6 1E1A                  | 27            | 94             |
| HHV6 1E1B                  | 18            | 94             |
| HHV7                       | 11            | 96             |
| HHV8 LANA                  | 22            | 99             |
| HHV8 K8.1                  | 22            | 93             |
| Hepatitis virus            |               |                |
| HBc                        | 14            | 99             |
| HBe                        | 22            | 99             |
| HCV1a NS3                  | 27            | 98             |
| Human T lymphotropic virus |               |                |
| HTLV1 gag                  | 48            | 83             |
| HTLV1 env                  | 25            | 0              |
| Human polyomavirus         |               |                |
| BKV                        | 12            | 98             |
| JCV                        | 14            | 99             |
| KIV                        | 10            | 99             |
| WUV                        | 18            | 94             |
| MCV                        | 12            | 97             |
| HPyV6                      | 10            | 99             |
| HPyV7                      | 15            | 98             |
| TSV                        | 13            | 98             |
| HPyV9                      | 35            | 92             |
| HPyV10                     | 9             | 99             |
| LPV                        | 21            | 98             |

CV, coefficient of variation; ICC, intraclass correlation coefficient.
