# Supplementary material
Source: PubMed Central journal article supplement (PMC7232664)
Supplement: Supp_TableS3.pdf [file Supp_TableS3.pdf]

SUPPLEMENTARY TABLE S3. PREVALENCE OF ANTIBODY SEROREACTIVITY IN AIDS-NON-HODGKIN LYMPHOMA CASES AND CONTROLS

| Antigen                           | AIDS-NHL        |       |                  |       |                 |       |                  |       |                                    |
|-----------------------------------|-----------------|-------|------------------|-------|-----------------|-------|------------------|-------|------------------------------------|
|                                   | Controls (n=67) |       | All cases (n=66) |       | Incident (n=28) |       | Prevalent (n=38) |       | Incident vs. Prevalent<br>p-Value* |
|                                   | n               | %     | n                | %     | n               | %     | n                | %     |                                    |
| <b>Human herpesviruses</b>        |                 |       |                  |       |                 |       |                  |       |                                    |
| HSV1 IgG                          | 46              | 68.7  | 46               | 69.7  | 21              | 75.0  | 25               | 65.8  | .42                                |
| HSV2 2mgG                         | 41              | 61.2  | 29               | 43.9  | 12              | 42.9  | 17               | 44.7  | .88                                |
| VZV gE                            | 7               | 10.5  | 8                | 12.1  | 6               | 21.4  | 2                | 5.3   | .06                                |
| VZV gI                            | 7               | 10.5  | 5                | 7.6   | 2               | 7.0   | 3                | 7.9   | 1.00                               |
| EBV VCA p18                       | 67              | 100.0 | 66               | 100.0 | 28              | 100.0 | 38               | 100.0 | —                                  |
| EBV Zebra                         | 59              | 88.1  | 52               | 78.8  | 20              | 71.4  | 32               | 84.2  | .21                                |
| EBV EA-D                          | 54              | 80.6  | 50               | 75.8  | 19              | 67.9  | 31               | 81.6  | .20                                |
| EBV EBNA1                         | 54              | 80.6  | 55               | 83.3  | 27              | 96.4  | 28               | 73.7  | <b>.02</b>                         |
| CMV pp 150                        | 60              | 89.6  | 52               | 78.8  | 23              | 82.1  | 29               | 76.3  | .57                                |
| CMV pp 28                         | 60              | 89.6  | 61               | 92.4  | 26              | 92.9  | 35               | 92.1  | 1.00                               |
| CMV pp 52                         | 67              | 100.0 | 65               | 98.5  | 28              | 100.0 | 37               | 97.4  | 1.00                               |
| HHV6 1E1A                         | 7               | 10.5  | 12               | 18.2  | 4               | 14.3  | 8                | 21.1  | .48                                |
| HHV6 1E1B                         | 13              | 19.4  | 6                | 9.1   | 2               | 7.1   | 4                | 10.5  | 1.00                               |
| HHV7 U14                          | 15              | 22.4  | 17               | 25.8  | 6               | 21.4  | 11               | 28.9  | .49                                |
| HHV8 LANA                         | 17              | 25.4  | 17               | 25.8  | 8               | 28.6  | 9                | 23.7  | .65                                |
| HHV8 K8.1                         | 9               | 13.4  | 11               | 16.7  | 6               | 21.4  | 5                | 13.2  | .51                                |
| <b>Hepatitis virus</b>            |                 |       |                  |       |                 |       |                  |       |                                    |
| HBc                               | 46              | 68.7  | 38               | 57.6  | 18              | 64.3  | 20               | 52.6  | .34                                |
| HBe                               | 40              | 59.7  | 36               | 54.6  | 17              | 60.7  | 19               | 50.0  | .39                                |
| HCV1a NS3                         | 10              | 14.9  | 5                | 7.6   | 4               | 14.3  | 1                | 2.6   | .15                                |
| <b>Human T lymphotropic virus</b> |                 |       |                  |       |                 |       |                  |       |                                    |
| HTLV1 gag                         | 2               | 3.0   | 0                | 0.0   | 0               | 0.0   | 0                | 0.0   | —                                  |
| HTLV1 env                         | 2               | 3.0   | 3                | 4.6   | 0               | 0.0   | 3                | 7.9   | —                                  |
| <b>Human polyomavirus</b>         |                 |       |                  |       |                 |       |                  |       |                                    |
| BKV                               | 53              | 79.1  | 52               | 78.8  | 18              | 64.3  | 34               | 89.5  | <b>.01</b>                         |
| JCV                               | 18              | 26.9  | 9                | 13.6  | 4               | 14.3  | 5                | 13.2  | 1.00                               |
| KIV                               | 5               | 67.2  | 39               | 59.1  | 18              | 64.3  | 21               | 55.3  | .46                                |
| WUV                               | 57              | 85.1  | 42               | 63.6  | 23              | 82.1  | 19               | 50.0  | <b>.007</b>                        |
| MCV                               | 43              | 64.2  | 36               | 54.6  | 15              | 53.6  | 21               | 55.3  | .89                                |
| HPyV6                             | 46              | 68.7  | 45               | 68.2  | 22              | 78.6  | 23               | 60.5  | .12                                |
| HPyV7                             | 24              | 35.8  | 26               | 39.4  | 10              | 35.7  | 16               | 42.1  | .60                                |
| TSV                               | 48              | 71.6  | 38               | 57.6  | 16              | 57.1  | 22               | 57.9  | .95                                |
| HPyV9                             | 5               | 7.5   | 8                | 12.2  | 2               | 7.1   | 6                | 15.8  | .45                                |
| HPyV10                            | 54              | 80.6  | 56               | 84.9  | 26              | 92.9  | 30               | 78.9  | .17                                |
| LPV                               | 2               | 3.0   | 3                | 4.6   | 0               | 0.0   | 3                | 7.9   | .26                                |

\*p-Values comparing incident vs. prevalent cases by chi-square test or Fisher's exact test. **Bold** font indicates p-value < .05. AIDS-NHL, AIDS-non-Hodgkin lymphoma.
